# Supplementary material for: Operando PEPICO unveils the catalytic fast pyrolysis mechanism of the three methoxyphenol isomers
Source: Royal Society of Chemistry journal article supplement (doi:10.1039/d2cp02741k), 2022-01-01
Supplement: d2cp02741k1.pdf [file d2cp02741k1.pdf]

## Supplementary information:

# Operando PEPICO unveils the catalytic fast pyrolysis mechanism of the three methoxyphenol isomers

Zeyou Pan<sup>a,b</sup>, Andras Bodi<sup>a</sup>, Jeroen A. van Bokhoven<sup>a,b</sup>, Patrick Hemberger<sup>a\*</sup>

<sup>a</sup> Zeyou Pan, Andras Bodi, Jeroen A. van Bokhoven and Patrick Hemberger,  
Paul Scherrer Institute, 5232 Villigen, Switzerland. E-mail: [patrick.hemberger@psi.ch](mailto:patrick.hemberger@psi.ch).

<sup>b</sup> Zeyou Pan and Jeroen A. van Bokhoven, Institute for Chemical and Bioengineering, Department of Chemistry and Applied Biosciences, ETH Zurich,  
8093 Zurich, Switzerland

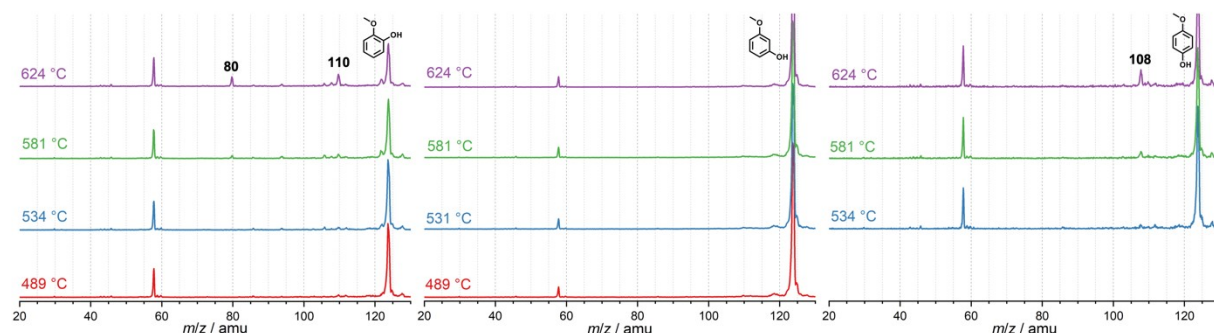

Figure S1. 1-, 2-, 3- and 4-methoxyphenol pyrolysis mass spectra as function of the reactor temperature. Conditions:  $h\nu = 10.5$  eV;  $\sim 0.01\%$  sample in Ar; without catalyst. Only in the 2-MP and 4-MP cases could some products be observed at  $m/z$  80, 110, and 108, which are assigned to cyclopentadienone, catechol and *p*-benzoquinone. The peak at  $m/z$  58, acetone, is an impurity in the detection chamber and remains constant in the whole temperature range.

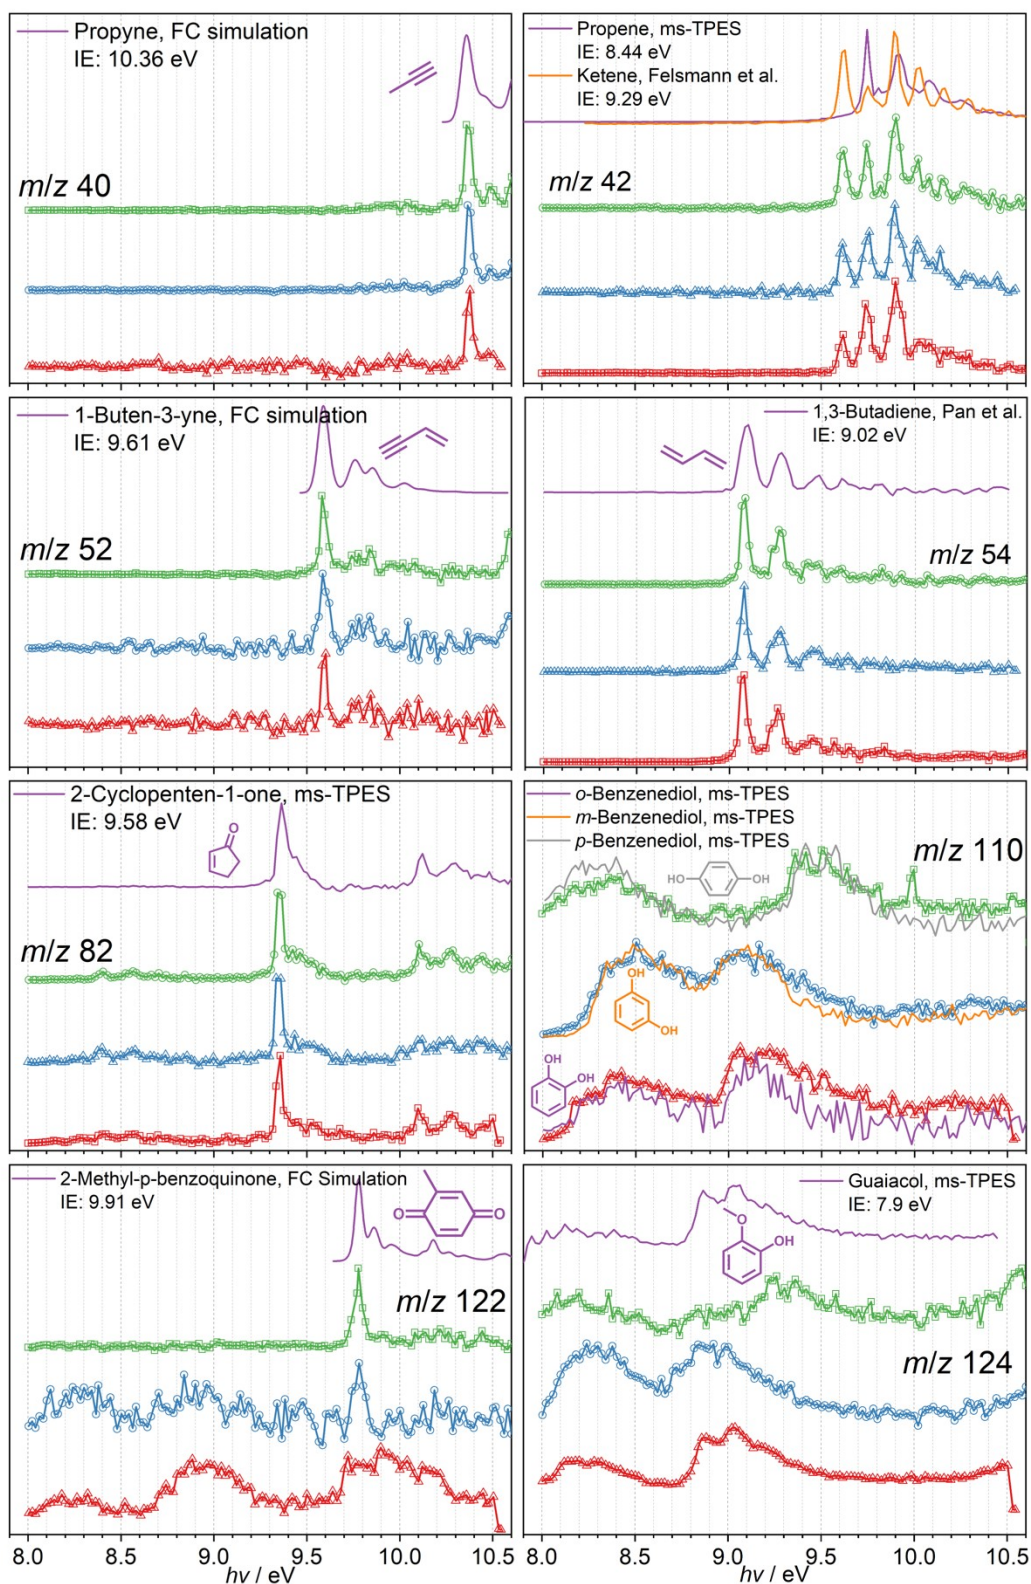

Figure S2. ms-TPE spectra of propyne ( $m/z$  40), ketene<sup>1</sup> and propyne ( $m/z$  42), vinylacetylene ( $m/z$  52), butadiene ( $m/z$  54)<sup>2</sup>, cyclopentenone ( $m/z$  82), the three benzenediol isomers ( $m/z$  110), methyl-p-benzoquinone, and the three methoxyphenols ( $m/z$  124). Red, blue, and green refer to the 2-MP, 3-MP and 4-MP catalytic pyrolysis ms-TPES over H-ZSM-5, respectively.

## References:

1. D. Felsmann, K. Moshhammer, J. Krüger, A. Lackner, A. Brockhinke, T. Kasper, T. Bierkandt, E. Akyildiz, N. Hansen, A. Lucassen, P. Oßwald, M. Köhler, G. A. Garcia, L. Nahon, P. Hemberger, A. Bodi, T. Gerber and K. Kohse-Höinghaus, *Proc. Combust. Inst.*, 2015, 35, 779-786.
2. Z. Pan, A. Puente-Urbina, A. Bodi, J. A. van Bokhoven and P. Hemberger, *Chem. Sci.*, 2021, 12, 3161-3169.
